## RESEARCH ARTICLE

# Herpes simplex virus co-infection facilitates rolling circle replication of the adeno-associated virus genome

Anita Felicitas Meier<sup>1</sup> , Kurt Tobler<sup>1</sup> , Remo Leisi<sup>2</sup> , Anouk Lkharrazi<sup>1</sup> , Carlos Ros<sup>2</sup> , Cornel Fraefel<sup>1\*</sup> 

**1** Institute of Virology, University of Zurich, Zurich, Switzerland, **2** Department for Chemistry, Biochemistry and Pharmaceutical Sciences, University of Bern, Bern, Switzerland

 These authors contributed equally to this work.

\* [cornel.fraefel@uzh.ch](mailto:cornel.fraefel@uzh.ch)

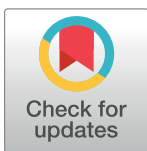

## Abstract

Adeno-associated virus (AAV) genome replication only occurs in the presence of a co-infecting helper virus such as adenovirus type 5 (AdV5) or herpes simplex virus type 1 (HSV-1). AdV5-supported replication of the AAV genome has been described to occur in a strand-displacement rolling hairpin replication (RHR) mechanism initiated at the AAV 3' inverted terminal repeat (ITR) end. It has been assumed that the same mechanism applies to HSV-1-supported AAV genome replication. Using Southern analysis and nanopore sequencing as a novel, high-throughput approach to study viral genome replication we demonstrate the formation of double-stranded head-to-tail concatemers of AAV genomes in the presence of HSV-1, thus providing evidence for an unequivocal rolling circle replication (RCR) mechanism. This stands in contrast to the textbook model of AAV genome replication when HSV-1 is the helper virus.

## OPEN ACCESS

**Citation:** Meier AF, Tobler K, Leisi R, Lkharrazi A, Ros C, Fraefel C (2021) Herpes simplex virus co-infection facilitates rolling circle replication of the adeno-associated virus genome. *PLoS Pathog* 17(6): e1009638. <https://doi.org/10.1371/journal.ppat.1009638>

**Editor:** David M. Knipe, Harvard Medical School, UNITED STATES

**Received:** March 4, 2021

**Accepted:** May 13, 2021

**Published:** June 1, 2021

**Copyright:** © 2021 Meier et al. This is an open access article distributed under the terms of the [Creative Commons Attribution License](https://creativecommons.org/licenses/by/4.0/), which permits unrestricted use, distribution, and reproduction in any medium, provided the original author and source are credited.

**Data Availability Statement:** Raw sequencing data used in this study have been deposited at the National Center for Biotechnology Information Sequence Read Archive (NCBI SRA) website (<https://www.ncbi.nlm.nih.gov/sra>) under the accession numbers PRJNA699763 and PRJNA699846.

**Funding:** Swiss National Science Foundation No. 310030\_184766 to C.F. <http://www.snf.ch/de/Seiten/default.aspx> The funders had no role in

## Author summary

Efficient adeno-associated virus (AAV) replication requires the presence of helper factors, which can be provided by co-infecting helper viruses such as adenoviruses or herpesviruses. AAV replication has been described to occur as a rolling hairpin replication mechanism. However, we show that during a herpes simplex virus type 1 (HSV-1) supported replication, AAV rolling circle-like replication intermediates are formed. Thus, this study stands in contrast to the textbook model of AAV genome replication. Additionally, we introduce nanopore sequencing as a novel, high-throughput approach to study viral genome replication in unprecedented detail.

## Introduction

Adeno-associated virus (AAV) is a small, non-pathogenic *Dependoparvovirus* and is predominantly known for its application in gene therapy [1,2]. The wildtype AAV genome consists of a

study design, data collection and analysis, decision to publish, or preparation of the manuscript.

**Competing interests:** The authors have declared that no competing interests exist.

single-stranded DNA (ss DNA) with a length of 4.7 kb containing a *rep* and a *cap* coding region flanked by 145 nucleotides long inverted terminal repeat (ITR) sequences [3,4]. AAV can only replicate in presence of helper factors, which can be provided by co-infecting helper viruses such as adenoviruses (AdV) or herpesviruses [5,6]. Helper factors are required to transactivate transcription of AAV genes and support AAV genome replication. It was suggested that concatemeric AAV DNA isolated from AAV2/AdV5 co-infected cells is organized as alternating plus and minus strands [7]. However, that study did not provide definite proof of such concatemers. Nevertheless, that observation together with preceding studies on the replication of autonomous parvoviruses and the proposal of a novel replication model for linear double-stranded DNA (ds DNA) [8] led to the currently widely accepted model of the rolling hairpin replication (RHR) of the AAV genome [8–13]. According to that model the RHR of the AAV genome is initiated at the palindromic terminal ITR sequences, which are capable of self-annealing into double hairpin structures [3] and thus providing the 3'-OH primer. Extension of the annealed 3' end leads to the generation of a duplex structure, which is covalently closed at one end. To resolve the closed end, a nick is introduced into one strand of the covalently closed ITR sequence at the terminal resolution site (*trs*) by AAV Rep68/78 [14]. The newly generated 3'-OH primer is then used to fill in the remaining gap to form a full-length linear open duplex configuration. Following denaturation of the ends and the subsequent re-annealing into double hairpin structures, a new 3'-OH primer is formed, and, upon strand-displacement, the progeny genome is released.

Several lines of evidence suggest that the described model is valid for AdV-supported AAV genome replication: (i) The predicted covalently closed double-stranded (ds) monomer structures have been isolated from AAV-infected cells [7,12]. (ii) It was shown that the palindromic ITR-sequences behave like origins of DNA replication [12,15,16]. (iii) Two different ITR orientations (flip and flop) have been observed and their relative orientation to each other was found to be independent [3,17]. The observation of two ITR orientations is in accordance with the model as it predicts that the ITRs are inverted relative to each other during each round of replication. (iv) Site-specific nicking of the *trs* was observed [14,18,19]. (v) It has been suggested that concatemers isolated from AAV/AdV co-infected cells consisted of alternating plus and minus strand AAV genomes [7]. Such concatemers are believed to arise in the absence of *trs*-nicking. It has been generally accepted that herpes simplex virus type 1 (HSV-1)-supported AAV genome replication occurs in the same manner as described for AdV-supported replication.

The widely accepted model for HSV-1 genome replication is that HSV-1 DNA circularizes upon entry, followed by an origin-dependent bidirectional replication, which then switches to a rolling circle replication (RCR) mechanism [20,21]. It has further been shown that addition of HSV-1 proteins essential for genome replication to non-viral plasmid DNA mediates amplification of the plasmid and leads to the formation of head-to-tail concatemers [22,23]. Since the AAV genome was found to circularize within the host cell [24,25], which is a prerequisite for RCR, we assessed if HSV-1 mediated AAV genome replication occurs in an RCR mechanism. We explored AAV genome replication intermediates using nanopore sequencing and Southern analysis. The nanopore sequencing technology provides the unique feature of extremely long reads and therefore enables the analysis of single replication intermediate molecules. As hypothesized, we found head-to-tail concatemers, which cannot be explained by the current model of AAV genome replication. Therefore, we suggest RCR as a novel replication model for the AAV genome amplification in presence of HSV-1 helper factors. In addition, we present nanopore sequencing as a novel, high-throughput approach to investigate the mechanism of viral genome replication. Nanopore sequencing has previously been applied to analyze the integrity of genomes of recombinant AAV vector stocks [26]. However, we are unaware of

any studies using nanopore sequencing for the unbiased identification of genome replication products and the assessment of viral genome replication mechanisms in infected cells.

## Results

### Categories of replication intermediates observed with nanopore sequencing

AAV genome replication may result in intermediate products that are not all detected in bulk approaches such as Southern blotting. Nanopore sequencing provides unique features, which are useful for the assessment of diverse nucleic acid populations. Sequencing length is (theoretically) unlimited and no fragmentation of sample material is required. We employed nanopore sequencing in order to identify and quantify the full range of AAV2 DNA replication intermediates in a high-throughput manner. For this, we extracted extrachromosomal DNA from BJ cells infected with non-replicating (single-infection) or replicating AAV2 (HSV-1 co-infection) using the Hirt protocol and sequenced the isolated DNA with nanopore technology (Fig 1A). Notably, extracted DNA was not linearized prior to sequencing. Since adapter ligation for nanopore sequencing requires linear genomes, circular genomes are automatically excluded from our analysis.

To facilitate the comparison of the heterogeneous DNA replication intermediates, AAV2 DNA reads were depicted as a function of the included genomic domains. Based on the characteristic patterns obtained, six categories of sequencing reads were defined as shown in Fig 1B. Category 1 reads appear as a single straight line crossing over to the other side of the graph from bottom to top (positive polarity) or top to bottom (negative polarity). Such reads represent single AAV2 genomes. Category 2 reads appear in a “V” or an “A” shape on the dot plot. These reads correspond to the duplex form of the AAV2 genome, two ss DNA genomes which are inverted relative to each other and covalently linked on one side as shown below the dot plot. Such structures would arise from single-to-double-strand conversion. Category 3 reads appear as parallel lines crossing the plot that represent multiple direct genome repetitions (head-to-tail concatemers) and would be expected from a rolling circle replication (RCR) mechanism. Category 4 reads appear as zigzag lines in the dot plot that represent multiple copies of the AAV2 genome with alternating orientation and would be expected from a rolling hairpin replication (RHR) mechanism, where *trs*-nicking did not occur. Category 5 reads appear as parallel lines broken up by “V” or “A” shaped structures that represent sequences combining both head-to-tail as well as alternating repeats. We suggest that those concatemers are generated by RCR followed by the re-annealing of the 3'-OH ITR and subsequent second-strand synthesis of the head-to-tail concatemers, resulting in the inversion of the RCR structure. Category 6 reads represent multiple ITR repetitions (no *rep*- and *cap*- sequences). Sequences that could not be assigned to any of the six categories were grouped in category 7. Many of those reads appear as defective, incomplete or shortened genomes (see S1 Fig for representative dot plots of reads assigned to category 7). It is unclear, how such reads were generated but their pattern suggests a defective replication mechanism.

### Nanopore sequence analysis of replicating AAV2 reveals RCR-like intermediates at high frequency

We sequenced extrachromosomal DNA isolated from AAV2 and HSV-1 co-infected cells and found a wide range of DNA replication intermediates. These reads were categorized as described in the section above (Fig 1B). We categorized 200 randomly selected reads per sample or all reads of the sample if the number was below 200. In Fig 2A–2F we show two representative dot plots of individual reads of each category; the frequency of these reads is shown

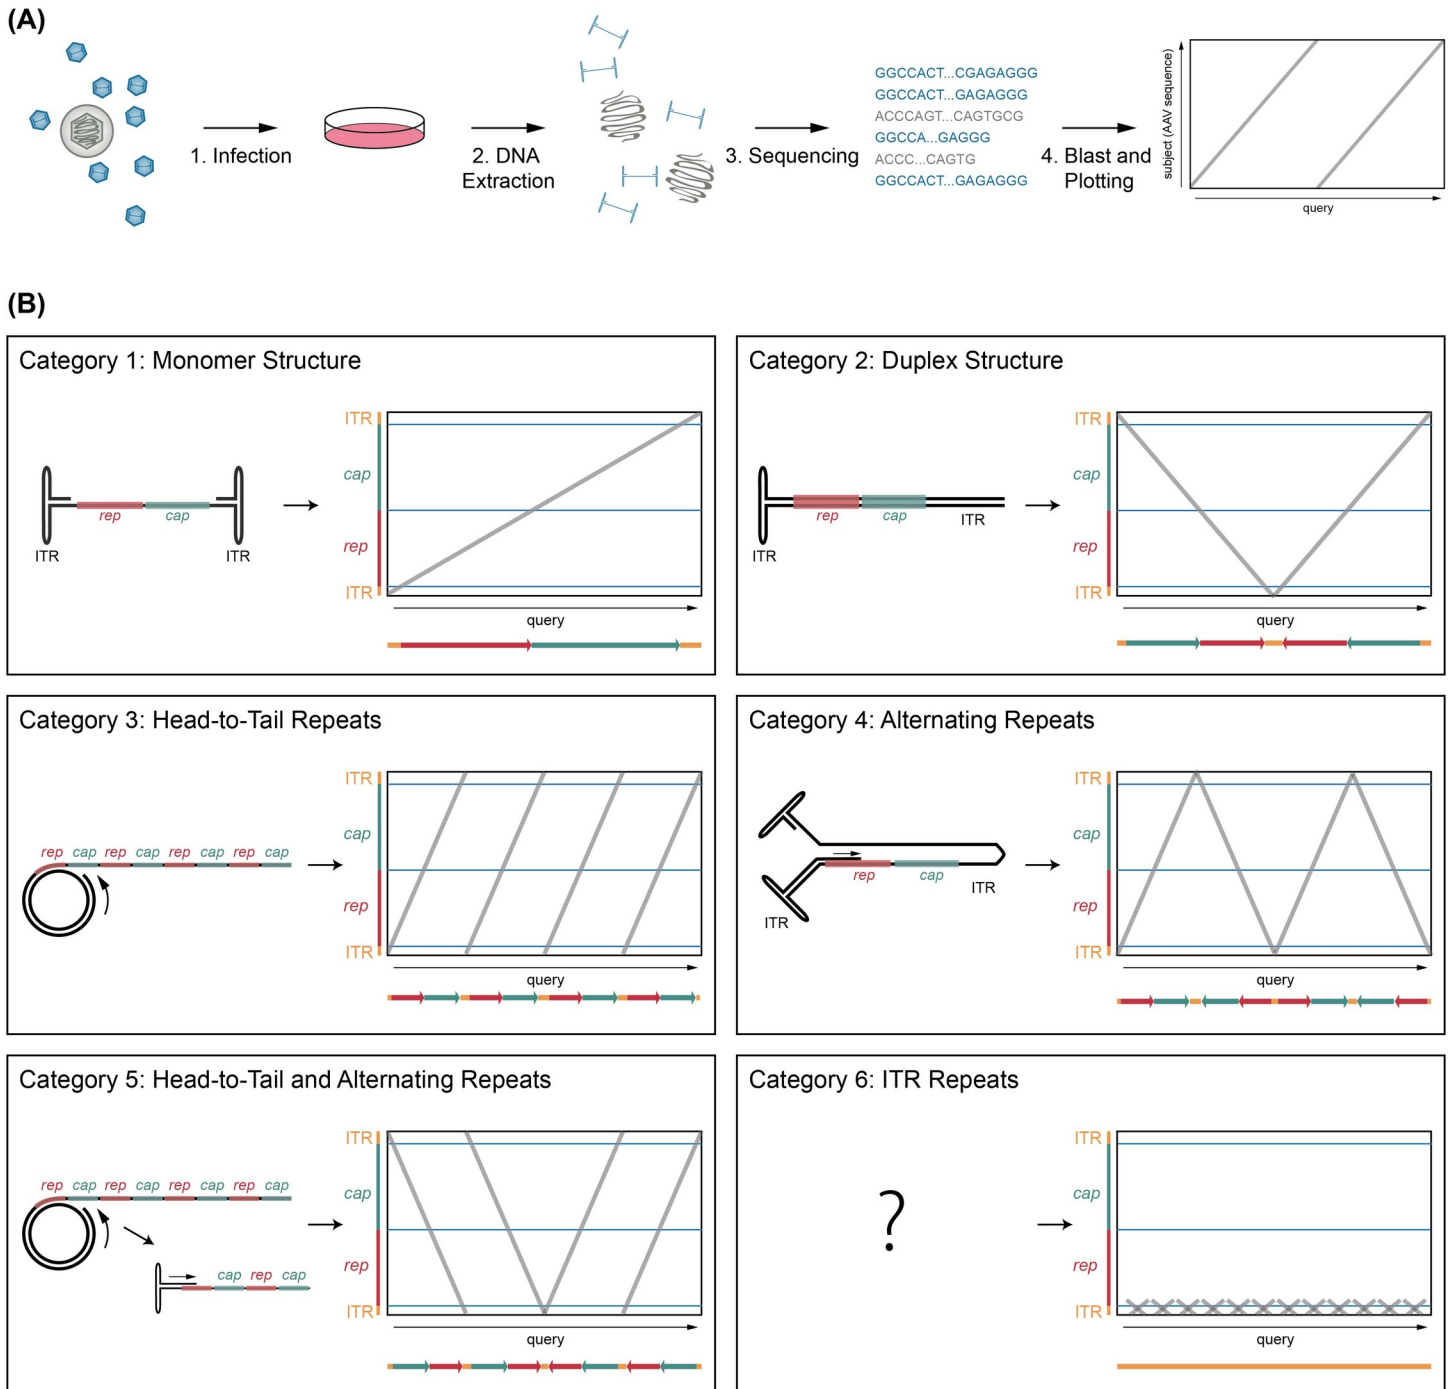

**Fig 1. Experimental setup and definition of categories of AAV2 DNA replication products.** (A) Schematic representation of the experimental setup. (B) Schematic representation of the defined categories with the predicted AAV DNA structure on the left and the corresponding theoretical dot plot on the right. Dot plots were used to visualize the AAV sequence from isolated genomes with the read (query) on the x-axis and the location on the AAV genome on the y-axis. For further clarification, the read sequence is shown below the dot plot. The AAV ITR-ends (orange) and the genome coding regions *rep* (red) and *cap* (green) are indicated. Of note, only one orientation is shown per category although both orientations are included.

<https://doi.org/10.1371/journal.ppat.1009638.g001>

in **Table 1**. According to Oxford Nanopore Technology, our adapter-ligation approach should exclude any ss DNA for sequencing as ds DNA is a prerequisite for the ligation of the sequencing adapters. Since encapsidated AAV genomes are present as ss DNA of positive or negative

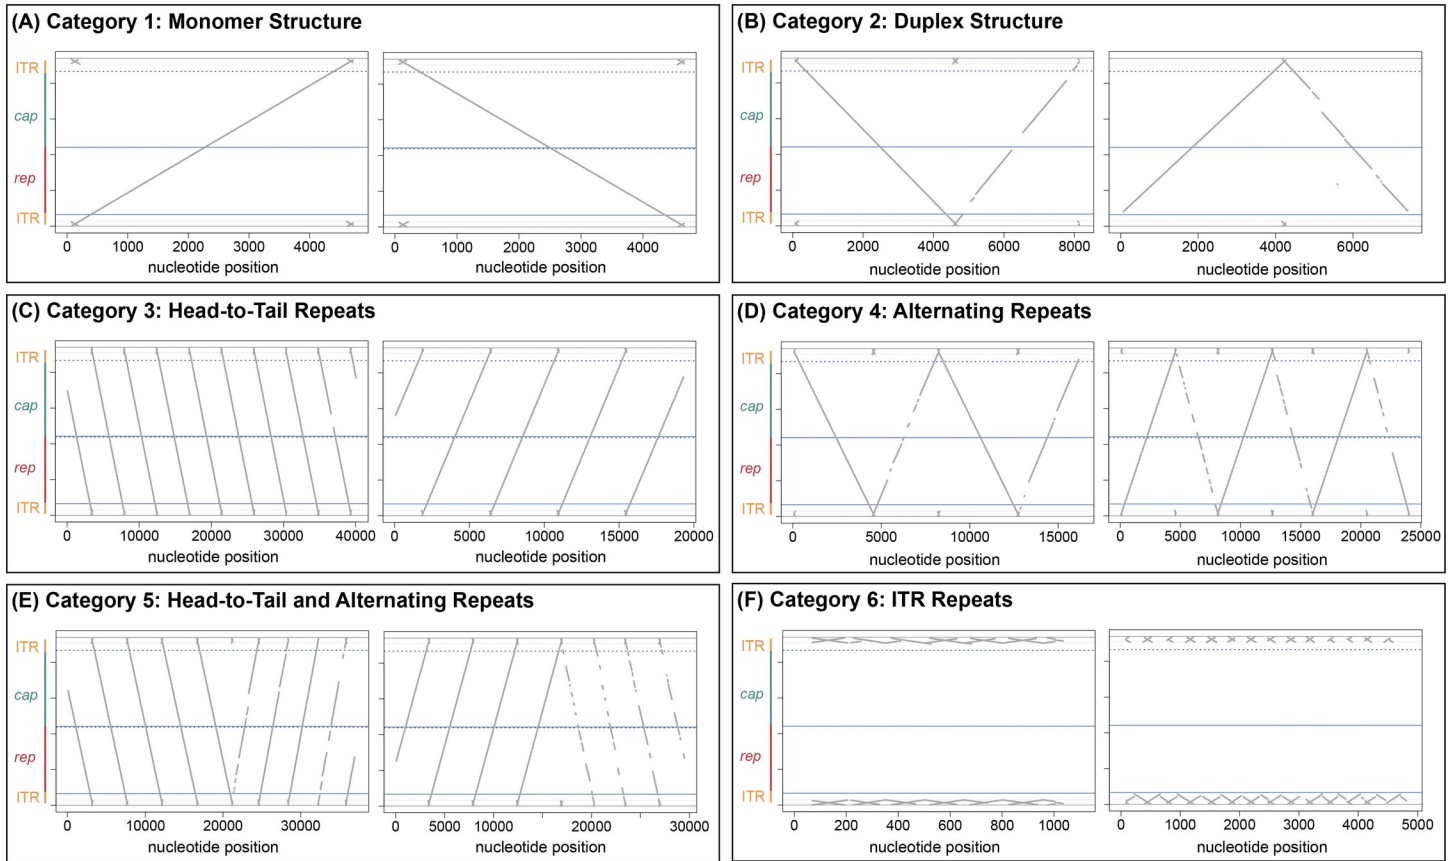

**Fig 2. AAV2 replication intermediates.** (A-F) Dot plots of two representative individual reads per category from AAV2/HSV-1 co-infected BJ cells are shown. Extrachromosomal DNA was isolated at 12 hpi from BJ cells infected with AAV2 (gcp/ cell = 20'000) and HSV-1 (pfu/cell = 1).

<https://doi.org/10.1371/journal.ppat.1009638.g002>

orientation in equal amounts [27], we assume that strand-annealing occurred prior to library preparation and thus we were able to detect monomer AAV2 genomes. Furthermore, ss AAV genomes might form ds DNA ends by adapting a panhandle structure upon annealing of both ITR-ends as suggested previously [17].

In samples of extrachromosomal DNA isolated from AAV2 infected BJ cells, the AAV2 DNA was mainly present as monomeric AAV2 genomes (category 1) (62% at AAV2 genome

**Table 1. Read analysis data from genomes isolated from purified AAV2 virus stock or AAV2 single- or HSV-1 co-infected BJ cells at 12 hpi.** \* Without Phe/CHCl<sub>3</sub>-purification before sequencing.

| Category:   |               | 1       | 2      | 3                    | 4                   | 5                                    | 6           | 7      |             |
|-------------|---------------|---------|--------|----------------------|---------------------|--------------------------------------|-------------|--------|-------------|
| Sample      |               | Monomer | Duplex | Head-to-Tail Repeats | Alternating Repeats | Head-to-Tail and Alternating Repeats | ITR Repeats | Others |             |
|             | AAV gcp/ cell | ratio   | ratio  | ratio                | ratio               | ratio                                | ratio       | ratio  | total reads |
| AAV2 stock  | NA            | 0.830   | 0.040  | 0.005                | 0.005               | 0.000                                | 0.065       | 0.055  | 200         |
| AAV2 stock* | NA            | 0.810   | 0.020  | 0.030                | 0.000               | 0.000                                | 0.065       | 0.075  | 200         |
| AAV2        | 20k           | 0.620   | 0.080  | 0.015                | 0.005               | 0.000                                | 0.190       | 0.090  | 200         |
| AAV2/HSV-1  | 20k           | 0.340   | 0.170  | 0.170                | 0.035               | 0.060                                | 0.100       | 0.125  | 200         |
| AAV2        | 500           | 0.250   | 0.333  | 0.000                | 0.000               | 0.000                                | 0.167       | 0.250  | 12          |
| AAV2/HSV-1  | 500           | 0.175   | 0.385  | 0.215                | 0.010               | 0.075                                | 0.010       | 0.130  | 200         |

<https://doi.org/10.1371/journal.ppat.1009638.t001>

containing particles (gcp)/cell = 20'000) (Table 1). 8% of AAV2 reads were present in the duplex form (category 2). Most of the remaining reads were assigned to category 6 (19%), which contains reads with ITR-repeats, or to category 7 (9%), which contains all other structures. These results were in line with our expectation of predominant monomeric AAV2 genomes and the occasional conversion of ss to ds DNA duplex structure.

In contrast, AAV2 reads from HSV-1 co-infected cells showed a dramatic change in the observed genome structures (Fig 2, Table 1). The ratio of monomeric AAV2 genome reads (category 1) was reduced to 34% for AAV2 gcp/ cell = 20'000 or 17.5% for AAV2 gcp/ cell = 500 (Table 1, Fig 2A). Formation of duplex structures (category 2) went up to 17% or 38.5% for AAV2 gcp/ cell = 20'000 or for AAV2 gcp/ cell = 500, respectively (Table 1, Fig 2B). The most remarkable result is that HSV-1 co-infection led to the appearance of head-to-tail concatemers (category 3) at 17% or 21.5% (for AAV2 gcp/ cell = 20'000 or for AAV2 gcp/ cell = 500, respectively) (Table 1, Fig 2C). We also observed concatemers of alternating orientation (category 4; head-to-head) that would be expected to result from a rolling hairpin replication mechanism upon omission of *trs*-nicking (3.5% or 1% for AAV2 gcp/ cell = 20'000 or for AAV2 gcp/ cell = 500, respectively) (Table 1, Fig 2D). However, these reads were far less abundant than the head-to-tail concatemers. Interestingly, structures presumably formed upon second-strand synthesis of an RCR product (category 5) were more abundant than concatemers with alternating genome orientation (category 4). 6% and 7.5% of reads from samples with AAV2 gcp/ cell = 20'000 or for AAV2 gcp/cell = 500, respectively, were assigned to category 5 (Table 1, Fig 2E). Interestingly, in the presence and absence of HSV-1, we identified a high abundance of reads which contain multiple repetitions of ITR sequences classified as category 6 (Fig 2F). Those structures were present in up to 19% of all reads and were generally more abundant in absence of HSV-1 (Table 1). Furthermore, we also identified those ITR-repeat containing reads in the virus stock samples with an abundance of 6.5% (Table 1). The source of those structures remains to be elucidated. AAV DNA, isolated from BJ cells infected with the replication-competent AAV2 variant AAV201, shows a comparable abundance and distribution of structures as seen in BJ cells infected with wtAAV2 (S1 Table). We did not observe a preference for a certain structural orientation for any category of our AAV2 datasets.

In addition, we analyzed the data with an alternative approach. For each read the number of genome repetitions were counted. For example, every read in category 2 (“duplex structures”) obtained two counts since two genome copies were present. Only reads allocated to categories 1 to 5 were assessed. Reads assigned to categories 6 and 7 (“ITR-repeats” and “others”) were not included in this analysis. This approach revealed that in the presence of HSV-1, about 30% of all genome copies were present as head-to-tail repeats while this number was below 1% in the absence of HSV-1 (S2 Table). In the presence of HSV-1, the percentage of genome copies in category 5 (“head-to-tail and alternating repeats”) increased to 21.9 or 16.4% for AAV2 gcp/ cell = 20'000 or AAV2 gcp/cell = 500 respectively (with 0% in the absence of HSV-1). These results further emphasize the importance of RCR-derived replication intermediates in the presence of HSV-1.

Quantification of the AAV2 stock reads showed that the vast majority (83 and 81%) were present as monomeric DNA of approximately 4.7 kb with either positive or negative polarity (category 1) (Table 1). The remaining population of reads were assigned to category 2 (duplex) (4 and 2%), category 3 (head-to-tail repeats) (0.5 and 3%), category 6 (ITR-repeats) (6.5%) or category 7 (other structures) (5.5 and 7.5%) (Table 1). The maximum size of most of those rather unexpected reads was around 5 kb, corresponding with the maximum packaging size of AAV [28]. This indicates that a considerable proportion of about 10–15% of viral particles contained defective genomes. Overall, these sequencing results were in line with our predictions, since we reasoned that most of the viral particles from the AAV2 stock sample contain a monomeric AAV2 genome.

In conclusion, monomeric AAV2 genomes were highly abundant in all samples. Complete duplex structures containing two full-length genome sequences were observed only in DNA samples isolated from infected cells but not from AAV2 stock samples. Reads from AAV2 stock samples categorized as duplex structure only contained one full-length genome with a few hundred additional base-pairs. Furthermore, head-to-tail concatemers were identified at high rates in samples from cells co-infected with AAV2 and HSV-1. Concatemers with a head-to-head structure expected from an RHR mechanism lacking *trs*-nicking were found only at very low rates. Therefore, we conclude that HSV-1 co-infection induces the formation of RCR-like head-to-tail concatemers of the AAV2 genome.

### Southern analysis of replicating AAV2 DNA reveals RCR products

We further assessed the structure of AAV2 genomes isolated from BJ cells infected with AAV2 or co-infected with AAV2 and HSV-1 by Southern analysis. Hirt-DNA extraction of cells infected with AAV2 only resulted in the appearance of a single band with a migration corresponding to about 3 kb of ds DNA (Fig 3B). This band represents the monomeric ss AAV2 DNA, as it disappeared upon mung bean nuclease (MBN) treatment, which specifically degrades ss DNA-containing fragments (Fig 3B). The same band was found in samples isolated from AAV2 and HSV-1 co-infected cells, which also disappeared upon MBN treatment (Fig 3B). HSV-1 co-infection led to the appearance of a MBN-resistant 4.7 kb band, representing ds AAV2 DNA (duplex) structures. In addition, higher molecular weight bands were observed, which represent concatemers (Fig 3B). Of note, higher molecular weight concatemers are underrepresented on the blot because these molecules transfer much less efficiently from the agarose gel onto the nylon membrane than smaller molecules. To reveal the nature of those concatemers, the samples were treated with *Hind*III, which cuts ds AAV2 genomes at nucleotide position 1882, within the *rep* sequence (Fig 3A). *Hind*III digestion of monomeric ds AAV2 DNA is expected to yield fragments of approximately 1.9 kb and 2.8 kb (Fig 3A). Since the Southern probe hybridizes to a *rep*-sequence within the 1.9 kb fragment, only this band can be observed. *Hind*III digestion of head-to-tail concatemers would result in genome-sized 4.7 kb fragments (Fig 3A). Digestion of head-to-head concatemers would result in a 3.8 kb and a 5.6 kb fragment but the hybridization probe only binds to the 3.8 kb fragment. *Hind*III does not digest ss DNA. *Hind*III treatment resulted in the disappearance of the concatemers observed in the samples from cells co-infected with AAV2 and HSV-1. Instead, a strong band of approximately 4.7 kb as well as two bands of approximately 3.8 kb and 1.9 kb appeared (Fig 3B). Since the 4.7 kb band was much stronger than the 3.8 kb band, this demonstrates that AAV2 genome replication intermediates isolated from cells co-infected with HSV-1 are present predominantly as head-to-tail concatemers of ds DNA. These results are in line with our sequencing results described above. Comparable results were obtained when Southern analysis was performed using extrachromosomal DNA extracted from AAV2 and HSV-1 co-infected 293T and HeLa cells (S2 Fig).

### Validation of nanopore sequencing for the detection of an RCR mechanism

To further validate our sequencing approach for determining viral genome replication mechanisms and support our finding that the predominant concatemer structure of HSV-1 assisted AAV2 genome replication are head-to-tail concatemers generated by RCR, we determined the replication products from a well characterized rolling circle amplification (RCA) [29]. Specifically, we analyzed the structures generated upon the isothermal bacteriophage Phi29 polymerase mediated RCA of the plasmid pUC19. As shown in Table 2 and S3 Fig, we found the same structures of parallel full plasmid repeats as described above as category 3. These reads make

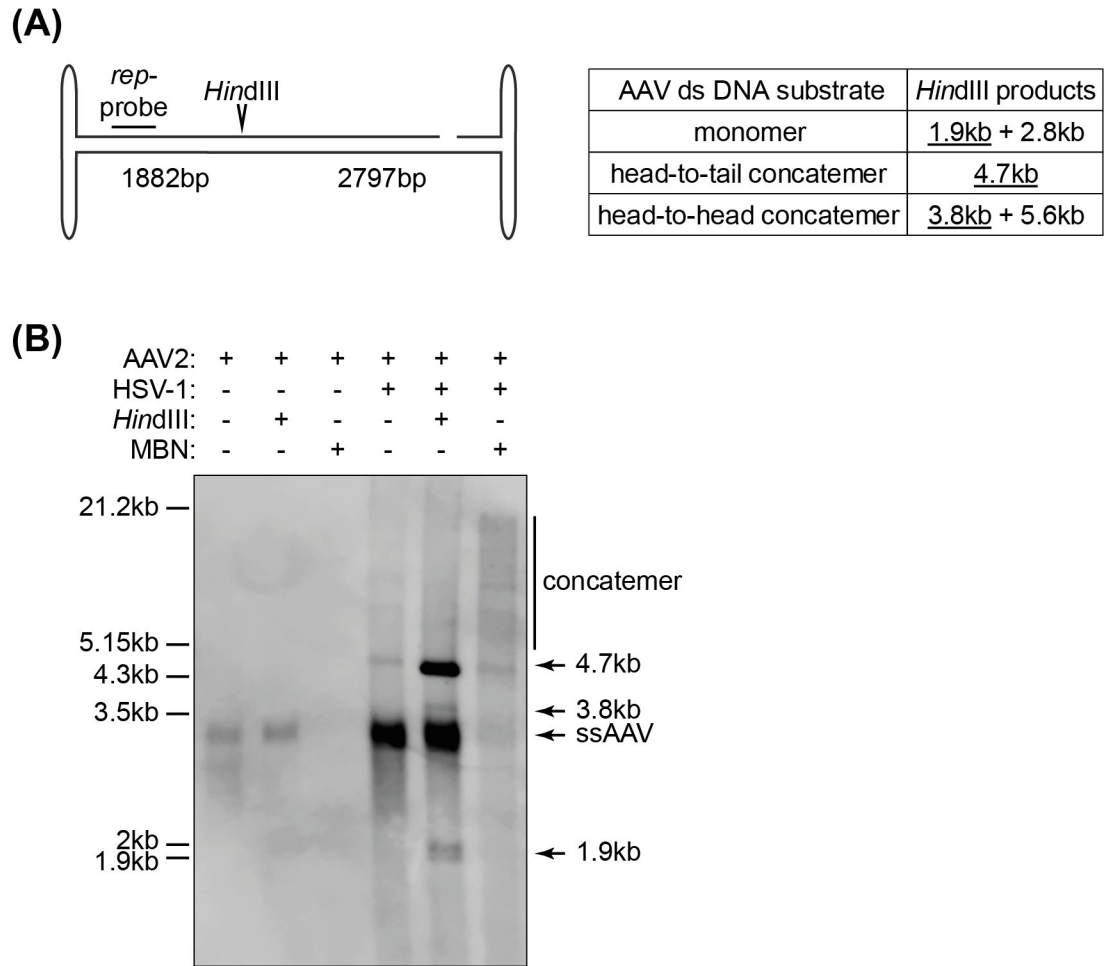

**Fig 3. Southern analysis of AAV2 DNA.** (A) Schematic representation of the AAV2 genome with the *Hind*III restriction site and the *rep*-probe binding site indicated. The table on the right shows the expected sizes of the fragments upon *Hind*III treatment with the fragment containing the *rep*-probe binding site underlined. (B) Southern blot of Hirt DNA extracted at 12 hpi from BJ cells infected with AAV2 alone (gcp/ cell = 20'000) or co-infected with AAV2 (gcp/ cell = 20'000) and HSV-1 (pfu/cell = 1) showing untreated, *Hind*III digested or mung bean nuclease (MBN) treated samples.

<https://doi.org/10.1371/journal.ppat.1009638.g003>

up 30.5% of all analyzed pUC19 reads. We also found a substantial number (64%) of reads showing a structure with a combination of head-to-tail and alternating concatemers as described for category 5. Phi29 polymerase-mediated generation of ds DNA was previously characterized and suggested to occur upon template switch [30]. Template switch of the RCA product would lead to concatemers containing head-to-tail repeats, which change polarity to continue further with head-to-tail repeats as seen in our reads assigned to category 5. Therefore, those previous results are in line with our observations. Furthermore, we found structures

**Table 2. Read analysis data of Phi29 polymerase mediated RCR of pUC19 DNA.**

| Category: | 1       | 2      | 3                    | 4                   | 5                                    | 7      |             |
|-----------|---------|--------|----------------------|---------------------|--------------------------------------|--------|-------------|
| Sample    | Monomer | Duplex | Head-to-Tail Repeats | Alternating Repeats | Head-to-Tail and Alternating Repeats | Others |             |
|           | ratio   | ratio  | ratio                | ratio               | ratio                                | ratio  | total reads |
| pUC19 RCR | 0       | 0.020  | 0.305                | 0                   | 0.640                                | 0.035  | 200         |

<https://doi.org/10.1371/journal.ppat.1009638.t002>



resembling the aforementioned duplex structures but to a lesser extent (2%). These results clearly show that Phi29-supported RCA results in the formation of structures similar to those isolated from AAV2 and HSV-1 co-infected cells. Additionally, 3.5% of reads could not be allocated to any of the other specific categories.

### Analysis of minute virus of mice DNA replication products

To validate our approach further, we analyzed sequences of DNA replication intermediates from the autonomous parvovirus minute virus of mice (MVM). MVM genome replication has been characterized in detail and was described to occur as a modified RHR mechanism similar to the one suggested for AdV-supported AAV genome replication [9,10,13,31]. In contrast to AAV, the MVM genome is flanked by two non-identical palindromic terminal (heterotelomeric) sequences and only one of those undergoes site-specific nicking during replication [10,32–34]. As a result, packaged MVM genomes are mainly, although not exclusively, present as ss DNA of negative orientation [1]. Furthermore, MVM duplex structures have a preference for a covalently linked (left) 5'-OH-end [31]. Extrachromosomal DNA isolated at 16 or 20 hpi from MVM-infected A9 cells, when viral DNA synthesis is maximal and before packaging [35], were sequenced and analyzed as described above. Each read was assigned to one of the previously defined categories (Fig 1B). Two representative dot plots per category are shown in Fig 4. Monomeric genome structures were less abundant in MVM-samples (14.5–25.5%) when compared to genomes isolated from AAV2 infected cells (17.5–62%) (Tables 1 and 3). However, as mentioned above, quantification of monomeric genome structures should be considered with caution as only ds DNA was described to be sequenced with our approach. Since MVM-genomes are predominantly packaged as negative sense ss DNA, only a small fraction of the genomes will anneal to a positive ss DNA and subsequently be sequenced. The most abundant structure of isolated MVM DNA was the duplex form (67–79.5%) (Table 3). MVM was described to replicate its genome via an obligatory dimer replicative form molecule [13] and therefore, our observation of a predominant duplex structure is in line with the textbook model of MVM replication. Those duplex structures were mainly present with a covalent link

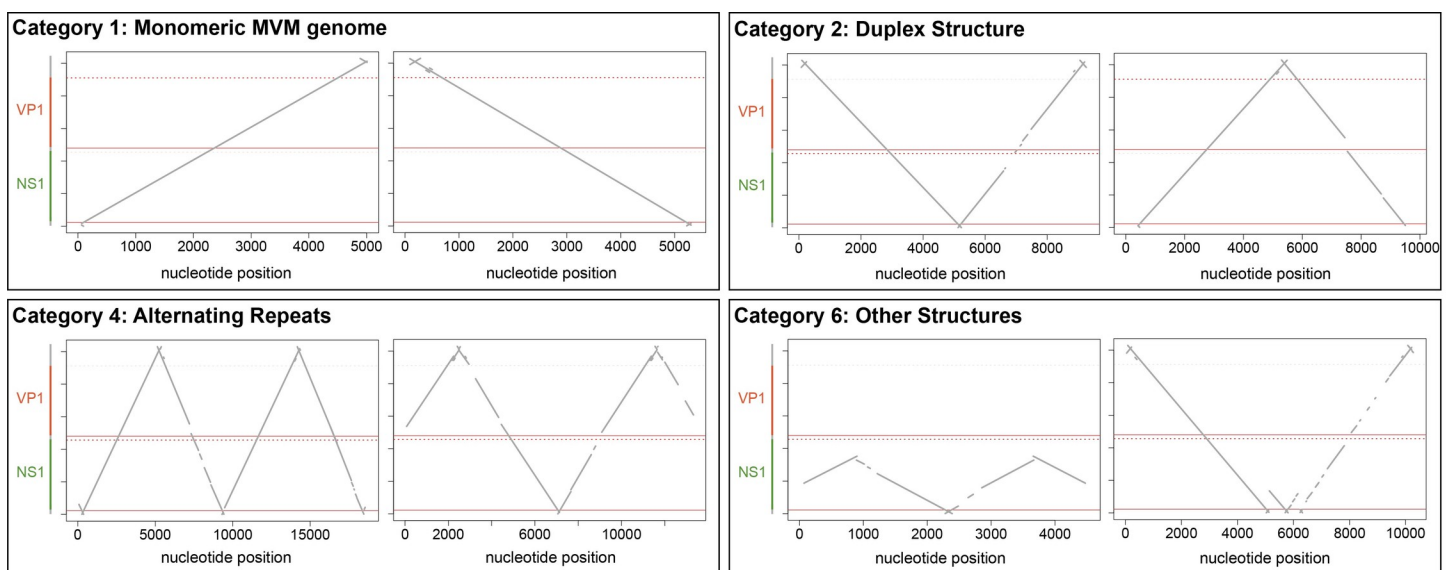

**Fig 4. MVM replication intermediates.** Dot plots of two representative individual reads per category from MVM infected A9 cells are shown. Extrachromosomal DNA was isolated at 16 hpi from A9 cells infected with MVM (MOI = 1'000).

<https://doi.org/10.1371/journal.ppat.1009638.g004>

Table 3. Read analysis data from extrachromosomal MVM sequences isolated from MVM infected A9 cells.

| Category: |         | 1       | 2      | 3                    | 4                   | 5                                    | 6               | 7      |             |
|-----------|---------|---------|--------|----------------------|---------------------|--------------------------------------|-----------------|--------|-------------|
| Sample    |         | Monomer | Duplex | Head-to-Tail Repeats | Alternating Repeats | Head-to-Tail and Alternating Repeats | Hairpin Repeats | Others |             |
| gcp/cell  | harvest | ratio   | ratio  | ratio                | ratio               | ratio                                | ratio           | ratio  | total reads |
| 1k        | 16hpi   | 0.225   | 0.730  | 0.000                | 0.025               | 0.000                                | 0.000           | 0.020  | 200         |
| 1k        | 20hpi   | 0.145   | 0.795  | 0.000                | 0.025               | 0.000                                | 0.000           | 0.035  | 200         |
| 10k       | 16hpi   | 0.184   | 0.767  | 0.000                | 0.010               | 0.000                                | 0.000           | 0.039  | 103         |
| 10k       | 20hpi   | 0.255   | 0.670  | 0.000                | 0.000               | 0.000                                | 0.000           | 0.075  | 200         |

<https://doi.org/10.1371/journal.ppat.1009638.t003>

at the 5'-OH-end (“V” structure; S3 Table). No such preference of duplex structure was found in AAV2-infected cells (S3 Table). These observations are also in line with the previously described model of MVM genome replication [13,31]. Importantly, no reads containing head-to-tail concatemers (category 3) were identified as MVM-replication intermediates. In contrast, concatemers of alternating repeats were indeed observed, although with a low abundance (0–2.5%). None of the reads showed a combination of head-to-tail and alternating repeats or multiple terminal end-repeats (categories 5 and 6). No clear difference in genome structure between samples harvested at 16 or 20 hpi was observed. However, MVM genome concatemers of alternating repeats were more abundant at the lower multiplicity of infection (1'000 gcp/ cell versus 10'000 gcp/cell). Overall, we identified replication intermediates as expected from the previously described replication model of the MVM genome [9,10,13,31] and did not find any indication for the generation of RCR-like replication products. This result further validates the use of nanopore sequencing to study viral genome replication mechanisms.

## Discussion

AAV2 genome replication in the presence of AdV was previously described to occur in a rolling hairpin amplification mode [1,7,9,13]. We provide evidence from nanopore sequencing and Southern analysis for an alternative mechanism of AAV2 genome replication when HSV-1 is the helper virus. Our results clearly show the abundant presence of head-to-tail concatemers (category 3), whereas head-to-head concatemers (category 4) were present in very low ratios. The head-to-tail concatemers were neither abundant in AAV2 viral stocks nor in cells infected with AAV2 alone and must therefore be induced by the HSV-1 co-infection. In addition, we identified reads that start as head-to-tail concatemers, then change orientation and continue again as head-to-tail concatemers (category 5). Both categories, 3 and 5, were found in high abundance in Phi29-polymerase mediated RCA samples, supporting our hypothesis that the observed head-to-tail concatemers of the AAV2 genomes arise from an RCR mechanism. However, we cannot exclude an additional RHR in the presence of HSV-1 as we do observe, albeit at very low levels, concatemers of AAV2 genomes with alternating orientation. Also, the low abundance of such concatemers may be due to efficient *trs*-nicking, which prevents concatemer formation.

There are two possibilities of how the head-to-tail concatemers are formed: intermolecular recombination or RCR. We regard RCR as more likely. If head-to-tail concatemers were generated by intermolecular recombination, the probability of concatemers containing multiple genome copies with the same direction would be very low. We observed head-to-tail concatemers of up to 13 repeats in the same direction. The likelihood that such large head-to-tail concatemers were formed upon end recombination would be  $0.5^{13-1} = 0.02\%$  (probability of 0.5 for either head-to-head or head-to-tail recombination at each of 12 junctions). Furthermore, if

concatemers were generated upon genome end recombination rather than RCR, we would expect more variety in the structure of concatemers and a higher abundance of alternating repeats.

Previous studies identified the helper factors for AAV replication. The essential AdV helper factors include the gene products of *E1a*, *E1b55K*, *E2a*, *E4orf6*, and the VA RNA [36,37]. It was shown that neither the AdV polymerase nor the terminal protein mediate amplification of the AAV2 genome [36,38,39]. Thus, the AdV helper factors provide indirect support for AAV2 genome replication. The minimal set of HSV-1 helper factors required to support replication in a transient AAV infection model are the helicase-primase complex (HP; UL5/ UL8/ UL52) and the single-strand DNA binding protein ICP8 [40]. Although sufficient to promote replication, the HP complex and ICP8 alone were only capable of restoring replication to about 1% compared to wildtype HSV-1 supported replication [41]. The addition of plasmids encoding the HSV-1 proteins ICP0, ICP4, ICP22 and the HSV-1 polymerase (UL30/UL42) together with ICP8 and the HP complex encoding plasmids restored the levels of AAV replication to levels comparable to a wildtype HSV-1 infection [42]. The HSV-1 proteins ICP0, ICP4 and ICP22 were found to transactivate AAV *rep* expression, thereby supporting replication [42]. While cellular polymerases were found to mediate replication of the AAV genome in the presence of AdV [43,44], the HSV-1 polymerase was shown to directly support AAV genome replication [44,45]. The essential factors for HSV-1 genome replication comprise ICP8, UL9, the HP complex and the HSV-1 polymerase [46]. It was also shown that these factors mediate a rolling circle amplification of non-viral plasmid DNA in the absence of the origin binding protein UL9 [22,23]. Thus, the minimal factors required for AAV genome replication are the same factors that are required to mediate RCR. Since the AAV genome was found to readily circularize even in the absence of a helper virus [25], it is conceivable that the HSV-1 mediated AAV genome replication occurs in an RCR mechanism.

The RCR-mechanism requires a circular template. AAV was found to circularize its genome within the host cell [24,25,47,48] and thus can be used as a substrate during RCR. Next during RCR, the origin of DNA replication is bound by an origin-binding protein and a site-specific nick is introduced into one strand. The large AAV Rep proteins (Rep68/78) were demonstrated to site-specifically bind and nick the AAV genome at the *trs* within the ITRs [19]. After nicking occurred, the ds DNA is unwound by a helicase and replicated by a DNA polymerase. Rep68/78 were shown to possess helicase activity [14]. Upon completion of an entire amplification cycle, an endonuclease nicks the genome at the origin, releasing the copied DNA. During bacterial or bacteriophage RCR, it is common that the endonuclease, which mediated nicking at the origin, stays covalently attached to the 5'-end possibly mediating the second nicking after replication of the genome (e.g. bacteriophage  $\phi$ X147 *cistron A* protein [49]). Rep68/78 were also demonstrated to remain covalently attached to the 5'-end of the AAV genome [38]. Thus, the large AAV Rep proteins possess activities, which are common for RCR-mediating proteins further supporting our hypothesis of an RCR-mechanism during AAV2 replication. The role of Rep68/78 during HSV-1 mediated RCR will be assessed in future studies.

In addition to revealing the structure of not previously described AAV2 DNA replication intermediates, we present a high-throughput method to investigate viral replication mechanisms. The unique feature of a, theoretically, endless sequencing length by the Oxford Nanopore Technology can be used to study replication intermediates on the level of single molecules in an unbiased manner. In previous approaches, such as Southern analysis, the samples were assessed in bulk and therefore, heterogeneous low-abundant DNA replication intermediates and transient structures were not detected. Our approach revealed the formation of head-to-tail concatemers, unexpected concatemers such as long repeats of the ITR-sequence

or a combination of head-to-tail and alternating genome concatemers. Further studies are required to address the question of whether, and how, head-to-tail concatemers can give rise to packageable AAV2 genomes.

## Materials and methods

### Cells and viruses

BJ (foreskin fibroblasts, human), Vero (kidney, African green monkey), Hela (cervical cancer, human), 293T (embryonic kidney, human) and A9 (fibroblasts, mouse) cells were obtained from ATCC (Manassas, Virginia, USA). All cell lines were maintained in Dulbecco's Modified Eagle's Medium (DMEM) with high glucose, supplemented with 10% fetal bovine serum (FBS), 2 mM glutamine, 100 units/ml penicillin, 100 µg/ml streptomycin, in a humidified incubator at 37°C and 5% CO<sub>2</sub>. Wildtype HSV-1 (strain F) was grown as previously described [50,51]. A confluent layer of Vero cells was infected at a low multiplicity of infection (MOI) and harvested when cells showed complete cytopathic effect (CPE). Cells were scraped into media, centrifuged, and the cell pellet was frozen and thawed three times. The supernatant and cell pellet were combined and centrifuged again. Aliquots were made from the supernatant and stored at -80°C. Plaque-forming units (pfu) were determined by plaque assay.

Purified AAV2 was produced by the Viral Vector Facility (University of Zurich, Switzerland) as previously described [52,53]. Wildtype AAV2 stocks were produced using the pAV2 plasmid, whereas the AAV2 variant AAV201 was produced using the pSub201 plasmid [54,55]. Stocks of MVM (rodent protoparvovirus 1; clone VR-1346; ATCC) were produced by infection of semi-confluent A9 cell culture as previously described [56]. Cell culture supernatant was collected four days post-infection (dpi), cleared by low-speed centrifugation (3000 x g) and stored in aliquots at -70°C. Viral load was determined by quantitative polymerase chain reaction (qPCR) and median tissue culture infectious dose (TCID<sub>50</sub>) assay.

### Preparation of AAV2 stock sample for sequencing

The AAV2 stock samples ( $1.5 \times 10^{11}$  genome-containing particles) were pre-treated with 10U DNase I (04716728001, Roche, Switzerland) in 1x DNase buffer for 15 min at 37°C to remove any DNA outside the particles. DNase was then inactivated, and capsids were denatured at 95°C for 5 min. The sample was either used directly for nanopore sequencing or a Phe/CHCl<sub>3</sub>-precipitation as described in the section below (Hirt extraction) was performed before sequencing.

### Infection protocol

Cells were seeded 24 h before infection. BJ cells were seeded at  $8 \times 10^5$  cells/tissue culture plate (10 cm in diameter; 172958, Nunc, Thermo Fisher Scientific, Waltham, MA, USA) with 8 tissue culture plates per condition. Virus (AAV2 in the presence or absence of HSV-1) was diluted in an appropriate volume of DMEM (0% FBS). Low infection volumes were chosen to enhance infection but ensuring the complete submersion of the cell layer. Cells were placed in a humidified incubator at 37°C and 5% CO<sub>2</sub>. One to two hours post infection (hpi), the supernatant was removed and sufficient DMEM containing 2% FBS was added. Cells were incubated in a humidified incubator at 37°C and 5% CO<sub>2</sub> for the indicated time. For MVM infection, A9 cells were inoculated at a confluency of 20–30% to ensure exponential cell growth during replication [57]. One T-150 flask per condition was infected with either 10 ml undiluted or 1/10 diluted MVM stock to obtain 10'000 and 1'000 genome equivalents per cell, respectively. The inoculum was removed 1 hpi and replaced with 15 ml DMEM, 10% FBS. Infected cells were incubated in a humidified incubator at 37°C and 5% CO<sub>2</sub> for the indicated time.

### Hirt extraction

Extraction of extrachromosomal DNA was performed according to the Hirt protocol [58]. Cells were washed with PBS and detached using 0.05% Trypsin-EDTA. The cell pellet was resuspended in 50  $\mu$ l TBS (50 mM Tris-HCl, 150 mM NaCl, pH 7.5). Then 500  $\mu$ l Hirt buffer (0.6% SDS, 10 mM Tris-HCl, 10 mM EDTA, pH 7.5) was added, and the suspension was incubated at room temperature for 1 h. After adding 120  $\mu$ l of a 5 M NaCl solution, the sample was incubated at 4°C for at least 12 h. For phenol/chloroform extraction of DNA, the sample was centrifuged at 15'500 g for 10 min at 4°C. The supernatant was transferred into a fresh tube and 1 volume of phenol: chloroform: isoamyl alcohol (25:24:1, v/v) was added. The sample was centrifuged at 15'500 g for 5 min at 4°C. The supernatant was transferred into a fresh tube and 1 volume of chloroform was added. The sample was centrifuged for 1 min at 15'500 g at 4°C. The supernatant was transferred into a fresh tube and 2.5 volumes of EtOH (pure) and 0.1 volume of 3 M NaAc pH 5.5 was added, and the suspension was incubated at -80°C for at least 20 min to precipitate the DNA. The sample was centrifuged at 18'000 g for 10 min at 4°C and the supernatant was discarded. The pellet was washed with 70% EtOH. After centrifugation at 18'000 g for 10 min at 4°C, the supernatant was removed and the pellet was air-dried before being resuspended in 10 mM Tris-HCl, pH 8.5.

### Rolling circle amplification of pUC19

Plasmid DNA (pUC19, 2 ng) was amplified using the circular DNA amplification kit Templi-Phi (25-6400-10, Cytiva, Marlborough, MA, USA) according to the manufacturer's protocol. Then, phenol/chloroform DNA purification was performed as described in the Hirt extraction protocol above.

### Nanopore sequencing

Nanopore sequencing was performed by the research group of Dr. A. Ramette (University of Bern, Switzerland). Hirt-extracted DNA samples were prepared for sequencing using the ligation sequencing kit (LSK109, Oxford Nanopore Technologies, Oxford, UK) and the native bar-coding expansion kit (EXP-NBD104, Oxford Nanopore Technologies, Oxford, UK) according to the manufacturer's protocol. Subsequently, the samples were sequenced using a GridION X5 sequencing device and flow cell (FLO-MIN-106, Oxford Nanopore Technologies, Oxford, UK).

### Data analysis

Sequences in fastq-format were transformed to fasta-format by seqkit [59]. The reads were subjected to blastn [60] analysis against the AAV2 or the MVM genomic sequence (Genbank # NC\_001401 or NC\_001510) or against the pUC19 plasmid sequence (Genbank #M77789). Lines with no hits and lines with comments were removed (grep -v '#') and tables were read into R 4.0 (The R Foundation for Statistical Computing). Hits with e-values > 0.1 were removed. The sums of all hits were calculated for every read. The reads with a sum of hits < 3000 were removed. Dot plots of the remaining reads were drawn. The dot plots were manually categorized. The code for the bioinformatic analysis can be found in the [S1 Bioinformatic code](#).

### Southern blot

For Southern analysis, extrachromosomal DNA was extracted using the Hirt protocol. *Hind*III treatment was performed at 37°C for 1 h in 1x reaction buffer B with 10U of *Hind*III enzyme

per reaction (*Hind*III, 10656321001, Roche, Switzerland). Mung bean nuclease treatment was performed at 30°C for 30 min in 1x mung bean nuclease reaction buffer with 1U per reaction (Mung Bean Nuclease, M0250S, New England Biolabs, Ipswich, MA, USA). DNA (40 ng per sample) was separated on 0.8% agarose gels and transferred onto nylon membranes (Hybond-N+, RPN119B, Amersham, Little Chalfont, UK). As reference, DIG-labeled marker was used (DNA molecular weight marker III, 11218602910, Roche). Hybridization with a digoxigenin (DIG)-labeled probe specific for AAV2 *rep*, subsequent detection by an anti-DIG antibody conjugated with alkaline phosphatase and activation with the chemiluminescence substrate CDP Star (Roche) were performed according to the manufacturer's protocol. The DIG-labeled probe was synthesized using the PCR DIG probe synthesis kit (**11636090910**, Roche, Switzerland) and the following primers: 5'-gaa cgc gat atc gca gcc gcc atg ccg gg-3' and 5'-gga tcc gaa ttc act gct tct ccg agg taa tc-3'. Chemiluminescence was imaged using the LI-COR imaging system Odyssey Fc (LI-COR Biosciences, Lincoln, NE, USA).

## Supporting information

**S1 Fig. AAV2 DNA replication intermediates.** Dot plots of individual reads assigned to category 7 (other structures) from AAV2/HSV-1 co-infected BJ cells are shown. Extrachromosomal DNA was isolated at 12 hpi from BJ cells infected with AAV2 (gcp/ cell = 20'000) and HSV-1 (pfu/cell = 1).

(TIF)

**S2 Fig. Southern analysis of AAV2 DNA.** Southern blot of Hirt DNA extracted at 15 hpi from 293T cells (A) or at 20 hpi from HeLa cells (B) co-infected with AAV2 (gcp/ cell = 20'000) and HSV-1 (pfu/cell = 1) showing untreated (a), *Hind*III digested (b) or mung bean nuclease treated (c) samples.

(TIF)

**S3 Fig. Amplification products of Phi29 polymerase mediated RCA on pUC19.** Dot plots of two individual reads per category of DNA isolated from Phi29 polymerase amplified pUC19.

(TIF)

**S1 Table. Read analysis data from genomes isolated from AAV201 single- or HSV-1 co-infected BJ cells at 12 hpi.**

(DOCX)

**S2 Table. Read analysis data from genomes isolated from AAV2 single- or HSV-1 co-infected BJ cells at 12 hpi.** The number of AAV genome copies per category was assessed. The same dataset to generate [Table 1](#) was used.

(DOCX)

**S3 Table. Further read analysis data from extrachromosomal MVM sequences isolated from MVM infected A9 cells or AAV2 sequences from AAV2 single- or HSV-1 co-infected BJ cells of category 2.** "A" and "V" indicate the orientation as observed in the dotplots. For AAV-sequences "A" indicates the presence of a covalent link at the 5'-end (cap-side) whereas "V" would indicate the presence of a covalent link at the 3'-end (rep-side).

(DOCX)

**S1 Bioinformatic code. Bioinformatic code used to analyze and plot the nanopore sequencing data.**

(DOCX)

## Acknowledgments

We thank Mathias Ackermann for the scientific discussions. We thank Alban Ramette and Stefan Neuenschwander for their support with nanopore sequencing. We thank Dinis Meier for his support in establishing the design of the figures. We thank Tobias Myland for proof-reading the manuscript.

## Author Contributions

**Conceptualization:** Anita Felicitas Meier, Kurt Tobler, Cornel Fraefel.

**Data curation:** Kurt Tobler.

**Formal analysis:** Anita Felicitas Meier, Kurt Tobler.

**Funding acquisition:** Cornel Fraefel.

**Investigation:** Anita Felicitas Meier, Kurt Tobler, Remo Leisi, Anouk Lkharrazi.

**Methodology:** Anita Felicitas Meier, Kurt Tobler, Carlos Ros, Cornel Fraefel.

**Project administration:** Anita Felicitas Meier, Kurt Tobler, Cornel Fraefel.

**Resources:** Carlos Ros, Cornel Fraefel.

**Software:** Kurt Tobler.

**Supervision:** Cornel Fraefel.

**Validation:** Anita Felicitas Meier, Kurt Tobler.

**Visualization:** Anita Felicitas Meier, Kurt Tobler.

**Writing – original draft:** Anita Felicitas Meier.

**Writing – review & editing:** Anita Felicitas Meier, Kurt Tobler, Remo Leisi, Anouk Lkharrazi, Carlos Ros, Cornel Fraefel.

## References

1. Knipe DM, Howley PM. *Fields Virology*. 6th ed. Philadelphia, PA 19103 USA: Wolters Kluwer Health/ Lippincott Williams & Wilkins; 2013.
2. Samulski RJ, Muzyczka N. AAV-Mediated Gene Therapy for Research and Therapeutic Purposes. *Annual Review of Virology*. 2014; 1: 427–451. <https://doi.org/10.1146/annurev-virology-031413-085355> PMID: 26958729
3. Lusby EW, Fife KH, Berns KI. Nucleotide Sequence of the Inverted Terminal Repetition in Adeno-Associated Virus DNA. *Journal of Virology*. 1980; 34: 402–409. <https://doi.org/10.1128/JVI.34.2.402-409.1980> PMID: 6246271
4. Srivastava A, Lusby EW, Berns KI. Nucleotide sequence and organization of the adeno-associated virus 2 genome. *Journal of Virology*. 1983; 45: 555–564. <https://doi.org/10.1128/JVI.45.2.555-564.1983> PMID: 6300419
5. Atchison RW, Casto BC, Hammon WMcD. Adenovirus-Associated Defective Virus Particles. *Science*. 1965; 754–755. <https://doi.org/10.1126/science.149.3685.754> PMID: 14325163
6. Buller RM, Janik JE, Sebring ED, Rose JA. Herpes simplex virus types 1 and 2 completely help adenovirus-associated virus replication. *Journal of virology*. 1981; 40: 241–247. <https://doi.org/10.1128/JVI.40.1.241-247.1981> PMID: 6270377
7. Straus SE, Sebring ED, Rose JA. Concatemers of alternating plus and minus strands are intermediates in adenovirus-associated virus DNA synthesis. *Proceedings of the National Academy of Sciences*. 1976; 73: 742–746. <https://doi.org/10.1073/pnas.73.3.742> PMID: 1062784
8. Cavalier-Smith T. Palindromic base sequences and replication of eukaryote chromosome ends. *Nature*. 1974; 250: 467–470. <https://doi.org/10.1038/250467a0> PMID: 4469597

9. Tattersall P, Ward DC. Rolling hairpin model for replication of parvovirus and linear chromosomal DNA. *Nature*. 1976; 263: 106–109. <https://doi.org/10.1038/263106a0> PMID: 967244
10. Astell CR, Chow MB, Ward DC. Sequence analysis of the termini of virion and replicative forms of minute virus of mice DNA suggests a modified rolling hairpin model for autonomous parvovirus DNA replication. *Journal of Virology*. 1985; 54: 171–177. <https://doi.org/10.1128/JVI.54.1.171-177.1985> PMID: 3973977
11. Tattersall P, Crawford LV, Shatkin AJ. Replication of the Parvovirus MVM II. Isolation and Characterization of Intermediates in the Replication of the Viral Deoxyribonucleic Acid. *Journal of Virology*. 1973; 12: 1446–1456. <https://doi.org/10.1128/JVI.12.6.1446-1456.1973> PMID: 4586779
12. Hauswirth WW, Berns KI. Origin and termination of adeno-associated virus DNA replication. *Virology*. 1977; 78: 488–499. [https://doi.org/10.1016/0042-6822\(77\)90125-8](https://doi.org/10.1016/0042-6822(77)90125-8) PMID: 867815
13. Berns KI. Parvovirus Replication. *Microbiological Reviews*. 1990; 54: 316–329. <https://doi.org/10.1128/mr.54.3.316-329.1990> PMID: 2215424
14. Im D-S, Muzyczka N. The AAV Origin Binding Protein Rep68 is an ATP-Dependent Site-Specific Endonuclease with DNA Helicase Activity. *Cell*. 1990; 61: 447–457. [https://doi.org/10.1016/0092-8674\(90\)90526-k](https://doi.org/10.1016/0092-8674(90)90526-k) PMID: 2159383
15. Samulski RJ, Srivastava A, Berns KI, Muzyczka N. Rescue of adeno-associated virus from recombinant plasmids: Gene correction within the terminal repeats of AAV. *Cell*. 1983; 33: 135–143. [https://doi.org/10.1016/0092-8674\(83\)90342-2](https://doi.org/10.1016/0092-8674(83)90342-2) PMID: 6088052
16. Senapathy P, Tratschin J-D, Carter BJ. Replication of Adeno-associated virus DNA. *Journal of Molecular Biology*. 1984; 178: 1–20. [https://doi.org/10.1016/0022-2836\(84\)90227-4](https://doi.org/10.1016/0022-2836(84)90227-4) PMID: 6090676
17. Lusby E, Bohenzky R, Berns KI. Inverted terminal repetition in adeno-associated virus DNA: independence of the orientation at either end of the genome. *Journal of Virology*. 1981; 37: 1083–1086. <https://doi.org/10.1128/JVI.37.3.1083-1086.1981> PMID: 6262528
18. Snyder RO, Samulski RJ, Muzyczka N. In Vitro Resolution of Covalently Joined AAV Chromosome Ends. *Cell*. 1990; 60: 105–113. [https://doi.org/10.1016/0092-8674\(90\)90720-y](https://doi.org/10.1016/0092-8674(90)90720-y) PMID: 2153052
19. Brister JR, Muzyczka N. Mechanism of Rep-Mediated Adeno-Associated Virus Origin Nicking. *Journal of Virology*. 2000; 74: 7762–7771. <https://doi.org/10.1128/jvi.74.17.7762-7771.2000> PMID: 10933682
20. Boehmer PE, Lehman IR. HERPES SIMPLEX VIRUS DNA REPLICATION. *Annu Rev Biochem*. 1997; 66: 347–384. <https://doi.org/10.1146/annurev.biochem.66.1.347> PMID: 9242911
21. Boehmer P, Nimmonkar A. Herpes Virus Replication. *IUBMB Life (International Union of Biochemistry and Molecular Biology: Life)*. 2003; 55: 13–22. <https://doi.org/10.1080/1521654031000070645> PMID: 12716057
22. Skaliter R, Makhov AM, Griffith JD, Lehman IR. Rolling circle DNA replication by extracts of herpes simplex virus type 1-infected human cells. *Journal of virology*. 1996; 70: 1132–1136. <https://doi.org/10.1128/JVI.70.2.1132-1136.1996> PMID: 8551573
23. Skaliter R, Lehman IR. Rolling circle DNA replication in vitro by a complex of herpes simplex virus type 1-encoded enzymes. *Proceedings of the National Academy of Sciences*. 1994; 91: 10665–10669. <https://doi.org/10.1073/pnas.91.22.10665> PMID: 7938010
24. Duan D, Sharma P, Yang J, Yue Y, Dudus L, Zhang Y, et al. Circular Intermediates of Recombinant Adeno-Associated Virus Have Defined Structural Characteristics Responsible for Long-Term Episomal Persistence in Muscle Tissue. *J VIROL*. 1998; 72: 11. <https://doi.org/10.1128/JVI.72.11.8568-8577.1998> PMID: 9765395
25. Sun X, Lu Y, Bish LT, Calcedo R, Wilson JM, Gao G. Molecular Analysis of Vector Genome Structures After Liver Transduction by Conventional and Self-Complementary Adeno-Associated Viral Serotype Vectors in Murine and Nonhuman Primate Models. *Human Gene Therapy*. 2010; 21: 750–761. <https://doi.org/10.1089/hum.2009.214> PMID: 20113166
26. Radukic MT, Brandt D, Haak M, Müller KM, Kalinowski J. Nanopore sequencing of native adeno-associated virus (AAV) single-stranded DNA using a transposase-based rapid protocol. *NAR Genomics and Bioinformatics*. 2020; 2. <https://doi.org/10.1093/nargab/lqaa074> PMID: 33575623
27. Berns KI, Adler S. Separation of Two Types of Adeno-Associated Virus Particles Containing Complementary Polynucleotide Chains. *Journal of Virology*. 1972; 9: 394–396. <https://doi.org/10.1128/JVI.9.2.394-396.1972> PMID: 5014934
28. Dong J-Y, Fan P-D, Frizzell RA. Quantitative Analysis of the Packaging Capacity of Recombinant Adeno-Associated Virus. *Human Gene Therapy*. 1996; 7: 2101–2112. <https://doi.org/10.1089/hum.1996.7.17-2101> PMID: 8934224
29. Dean FB. Rapid Amplification of Plasmid and Phage DNA Using Phi29 DNA Polymerase and Multiply-Primed Rolling Circle Amplification. *Genome Research*. 2001; 11: 1095–1099. <https://doi.org/10.1101/gr.180501> PMID: 11381035



30. Ducani C, Bernardinelli G, Högberg B. Rolling circle replication requires single-stranded DNA binding protein to avoid termination and production of double-stranded DNA. *Nucleic Acids Research*. 2014; 42: 10596–10604. <https://doi.org/10.1093/nar/gku737> PMID: 25120268
31. Tullis G, Schoborg RV, Pintel DJ. Characterization of the temporal accumulation of minute virus of mice replicative intermediates. *Journal of General Virology*. 1994; 75: 1633–1646. <https://doi.org/10.1099/0022-1317-75-7-1633> PMID: 8021594
32. Astell CR, Thomson M, Merchlinsky M, Ward DC. The complete DNA sequence of minute virus of mice, an autonomous parvovirus. *Nucleic Acids Research*. 1983; 11: 999–1018. <https://doi.org/10.1093/nar/11.4.999> PMID: 6298737
33. Astell CR, Gardiner EM, Tattersall P. DNA Sequence of the Lymphotropic Variant of Minute Virus of Mice, MVM(i), and Comparison with the DNA Sequence of the Fibrotropic Prototype Strain. *Journal of Virology*. 1986; 57: 656–669. <https://doi.org/10.1128/JVI.57.2.656-669.1986> PMID: 3502703
34. Willwand K, Baldauf AQ, Deleu L, Mumtsidu E, Costello E, Beard P, et al. The minute virus of mice (MVM) nonstructural protein NS1 induces nicking of MVM DNA at a unique site of the right-end telomere in both hairpin and duplex conformations in vitro. *Journal of General Virology*. 1997; 2647–2655. <https://doi.org/10.1099/0022-1317-78-10-2647> PMID: 9349487
35. Wolfisberg R, Kempf C, Ros C. Late Maturation Steps Preceding Selective Nuclear Export and Egress of Progeny Parvovirus. McFadden G, editor. *J Virol*. 2016; 90: 5462–5474. <https://doi.org/10.1128/JVI.02967-15> PMID: 27009963
36. Weitzman MD, Linden RM. Adeno-Associated Virus Biology. In: Snyder RO, Moullier P, editors. *Adeno-Associated Virus*. Totowa, NJ: Humana Press; 2012. pp. 1–23. Available: [http://link.springer.com/10.1007/978-1-61779-370-7\\_1](http://link.springer.com/10.1007/978-1-61779-370-7_1)
37. Meier AF, Fraefel C, Seyffert M. The Interplay between Adeno-Associated Virus and its Helper Viruses. *Viruses*. 2020; 12: 32. <https://doi.org/10.3390/v12060662> PMID: 32575422
38. Snyder RO, Im DS, Muzyczka N. Evidence for covalent attachment of the adeno-associated virus (AAV) rep protein to the ends of the AAV genome. *Journal of Virology*. 1990; 64: 6204–6213. <https://doi.org/10.1128/JVI.64.12.6204-6213.1990> PMID: 2173787
39. Straus SE, Ginsberg HS, Rose JA. DNA-Minus Temperature-Sensitive Mutants of Adenovirus Type 5 Help Adenovirus-Associated Virus Replication. *Journal of Virology*. 1976; 17: 140–148. <https://doi.org/10.1128/JVI.17.1.140-148.1976>
40. Weindler FW, Heilbronn R. A subset of herpes simplex virus replication genes provides helper functions for productive adeno-associated virus replication. *Journal of virology*. 1991; 65: 2476–2483. <https://doi.org/10.1128/JVI.65.5.2476-2483.1991> PMID: 1850024
41. Slanina H, Weger S, Stow ND, Kuhrs A, Heilbronn R. Role of the Herpes Simplex Virus Helicase-Primase Complex during Adeno-Associated Virus DNA Replication. *Journal of Virology*. 2006; 80: 5241–5250. <https://doi.org/10.1128/JVI.02718-05> PMID: 16699004
42. Alazard-Dany N, Nicolas A, Ploquin A, Strasser R, Greco A, Epstein AL, et al. Definition of Herpes Simplex Virus Type 1 Helper Activities for Adeno-Associated Virus Early Replication Events. O'Hare P, editor. *PLoS Pathogens*. 2009; 5: e1000340. <https://doi.org/10.1371/journal.ppat.1000340> PMID: 19282980
43. Nash K, Chen W, Muzyczka N. Complete In Vitro Reconstitution of Adeno-Associated Virus DNA Replication Requires the Minichromosome Maintenance Complex Proteins. *Journal of Virology*. 2008; 82: 1458–1464. <https://doi.org/10.1128/JVI.01968-07> PMID: 18057257
44. Handa H, Carter BJ. Adeno-associated Virus DNA Replication Complexes in Herpes Simplex Virus or Adenovirus-infected Cells. *The Journal of Biological Chemistry*. 1979; 254: 6603–6610. PMID: 221504
45. Ward P, Falkenberg M, Elias P, Weitzman M, Linden RM. Rep-Dependent Initiation of Adeno-Associated Virus Type 2 DNA Replication by a Herpes Simplex Virus Type 1 Replication Complex in a Reconstituted System. *Journal of Virology*. 2001; 75: 10250–10258. <https://doi.org/10.1128/JVI.75.21.10250-10258.2001> PMID: 11581393
46. Wu CA, Nelson NJ, McGeoch DJ, Challberg MD. Identification of herpes simplex virus type 1 genes required for origin-dependent DNA synthesis. *Journal of Virology*. 1988; 62: 435–443. <https://doi.org/10.1128/JVI.62.2.435-443.1988> PMID: 2826806
47. Musatov SA, Scully TA, Dudus L, Fisher KJ. Induction of Circular Episomes during Rescue and Replication of Adeno-Associated Virus in Experimental Models of Virus Latency. *Virology*. 2000; 275: 411–432. <https://doi.org/10.1006/viro.2000.0504> PMID: 10998340
48. Nakai H, Yant SR, Storm TA, Fuess S, Meuse L, Kay MA. Extrachromosomal Recombinant Adeno-Associated Virus Vector Genomes Are Primarily Responsible for Stable Liver Transduction In Vivo. *J Virol*. 2001; 75: 6969–6976. <https://doi.org/10.1128/JVI.75.15.6969-6976.2001> PMID: 11435577

49. Eisenberg S, Griffith J, Kornberg A. 4X174 cistron A protein is a multifunctional enzyme in DNA replication. *Proc Natl Acad Sci USA*. 1977; 74: 3198–3202. <https://doi.org/10.1073/pnas.74.8.3198> PMID: 269383
50. Sutter SO, Marconi P, Meier AF. Herpes Simplex Virus Growth, Preparation, and Assay. In: Diefenbach RJ, Fraefel C, editors. *Herpes Simplex Virus: Methods and Protocols*. New York, NY: Springer New York; 2020. pp. 57–72. [https://doi.org/10.1007/978-1-4939-9814-2\\_3](https://doi.org/10.1007/978-1-4939-9814-2_3) PMID: 31617172
51. de Oliveira AP, Glauser DL, Laimbacher AS, Strasser R, Schraner EM, Wild P, et al. Live Visualization of Herpes Simplex Virus Type 1 Compartment Dynamics. *Journal of Virology*. 2008; 82: 4974–4990. <https://doi.org/10.1128/JVI.02431-07> PMID: 18337577
52. Vogel R, Seyffert M, Strasser R, de Oliveira AP, Dresch C, Glauser DL, et al. Adeno-Associated Virus Type 2 Modulates the Host DNA Damage Response Induced by Herpes Simplex Virus 1 during Coinfection. *Journal of Virology*. 2012; 86: 143–155. <https://doi.org/10.1128/JVI.05694-11> PMID: 22013059
53. Zolotukhin S, Byrne BJ, Mason E, Zolotukhin I, Potter M, Chesnut K, et al. Recombinant adeno-associated virus purification using novel methods improves infectious titer and yield. *Gene Ther*. 1999; 6: 973–985. <https://doi.org/10.1038/sj.gt.3300938> PMID: 10455399
54. Samulski RJ, Chang LS, Shenk T. A recombinant plasmid from which an infectious adeno-associated virus genome can be excised in vitro and its use to study viral replication. *Journal of Virology*. 1987; 61: 3096–3101. <https://doi.org/10.1128/JVI.61.10.3096-3101.1987> PMID: 3041032
55. Laughlin C, Tratschin J-D, Coon H, Carter BJ. Cloning of infectious adeno-associated virus genomes in bacterial plasmids. *Gene*. 1983; 65–73. [https://doi.org/10.1016/0378-1119\(83\)90217-2](https://doi.org/10.1016/0378-1119(83)90217-2) PMID: 6352411
56. Leisi R, Wolfisberg R, Nowak T, Caliaro O, Hemmerle A, Roth NJ, et al. Impact of the isoelectric point of model parvoviruses on viral retention in anion-exchange chromatography. *Biotechnol Bioengineering*. 2020; 1–14. <https://doi.org/10.1002/bit.27555> PMID: 32886351
57. Tattersall P. Replication of the Parvovirus MVM I. Dependence of Virus Multiplication and Plaque Formation on Cell Growth. *Journal of Virology*. 1972; 10: 586–590. <https://doi.org/10.1128/JVI.10.4.586-590.1972> PMID: 4673484
58. Hirt B. Selective extraction of polyoma DNA from infected mouse cell cultures. *Journal of Molecular Biology*. 1967; 26: 365–369. [https://doi.org/10.1016/0022-2836\(67\)90307-5](https://doi.org/10.1016/0022-2836(67)90307-5) PMID: 4291934
59. Shen W, Le S, Li Y, Hu F. SeqKit: A Cross-Platform and Ultrafast Toolkit for FASTA/Q File Manipulation. Zou Q, editor. *PLoS ONE*. 2016; 11: e0163962. <https://doi.org/10.1371/journal.pone.0163962> PMID: 27706213
60. Altschul SF, Gish W, Miller W, Myers EW, Lipman DJ. Basic Local Alignment Search Tool. *J Mol Biol*. 1990; 215: 403–410. [https://doi.org/10.1016/S0022-2836\(05\)80360-2](https://doi.org/10.1016/S0022-2836(05)80360-2) PMID: 2231712
